# Supplementary material for: Where Do Caregivers Take Their Sick Children for Care? An Analysis of Care Seeking and Equity in 24 USAID Priority Countries
Source: PubMed Central journal article supplement (PMC7541105; doi:10.9745/ghsp-d-20-00115), 2020-09-30

### Acute Respiratory Infection Prevalence and Disparity Between Children in the Poorest and Wealthiest Households

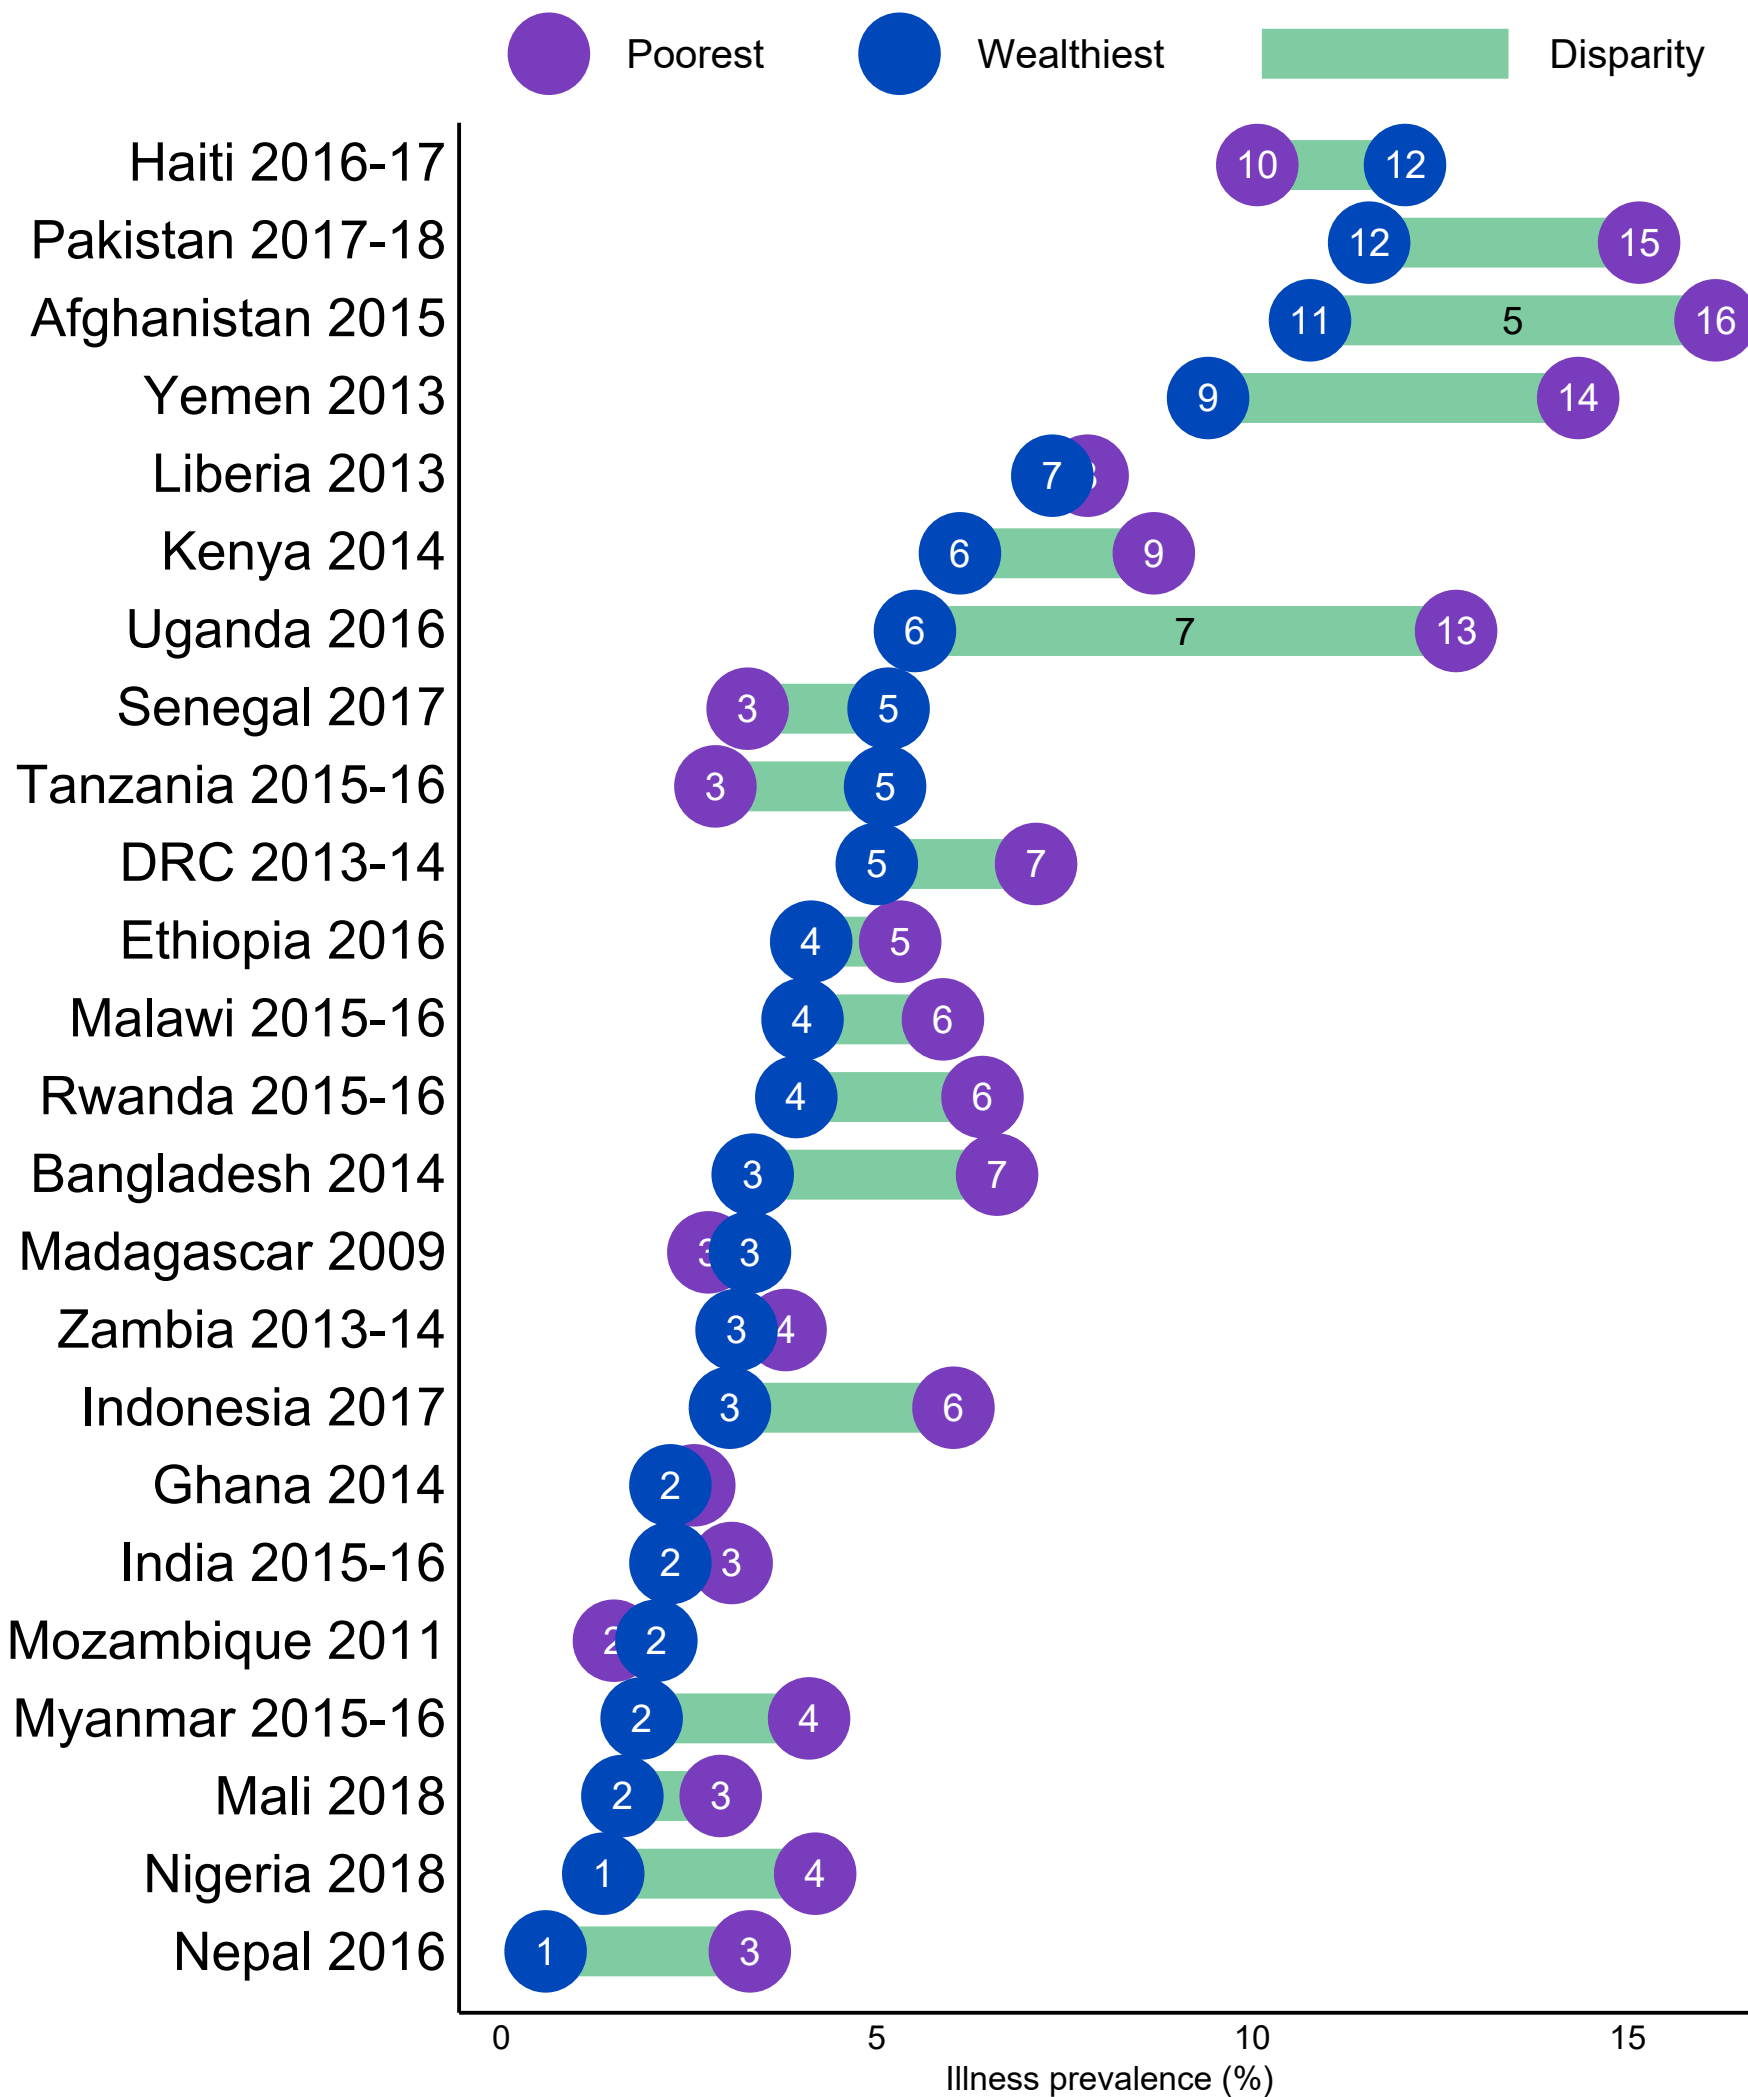

### Diarrhea Prevalence and Disparity Between Children in the Poorest and Wealthiest Households

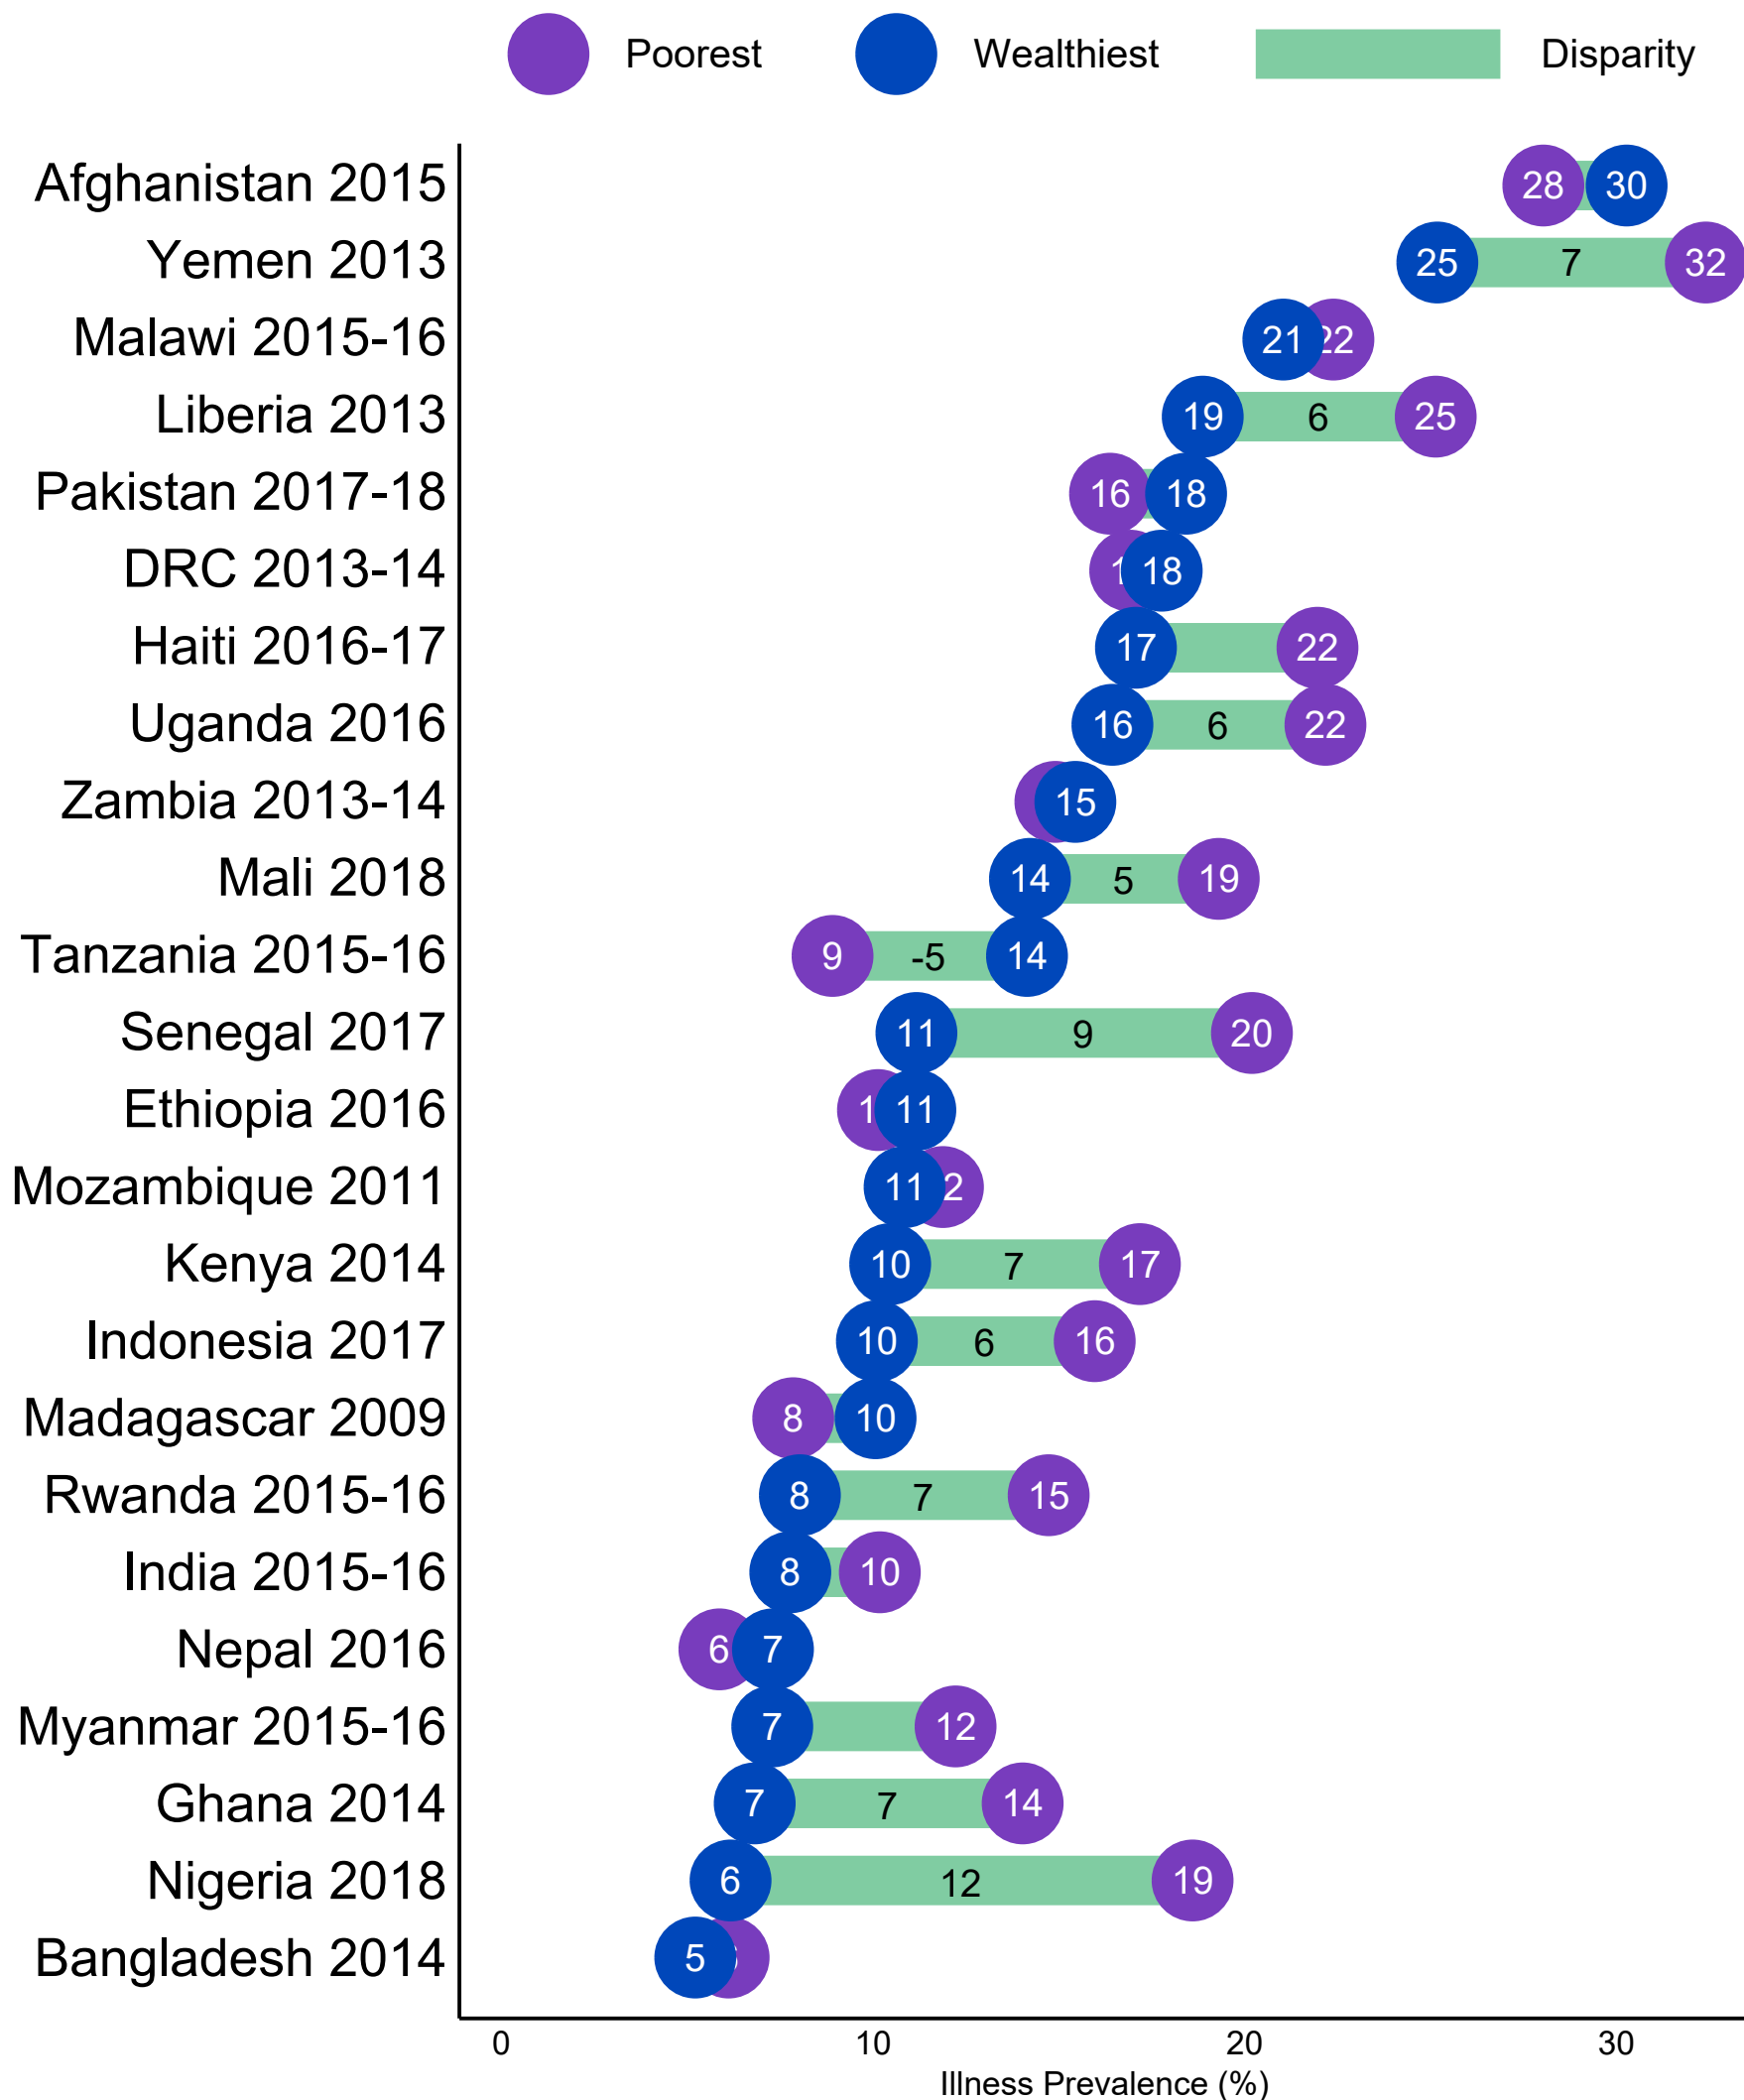

### Fever Prevalence and Disparity Between Children in the Poorest and Wealthiest Households

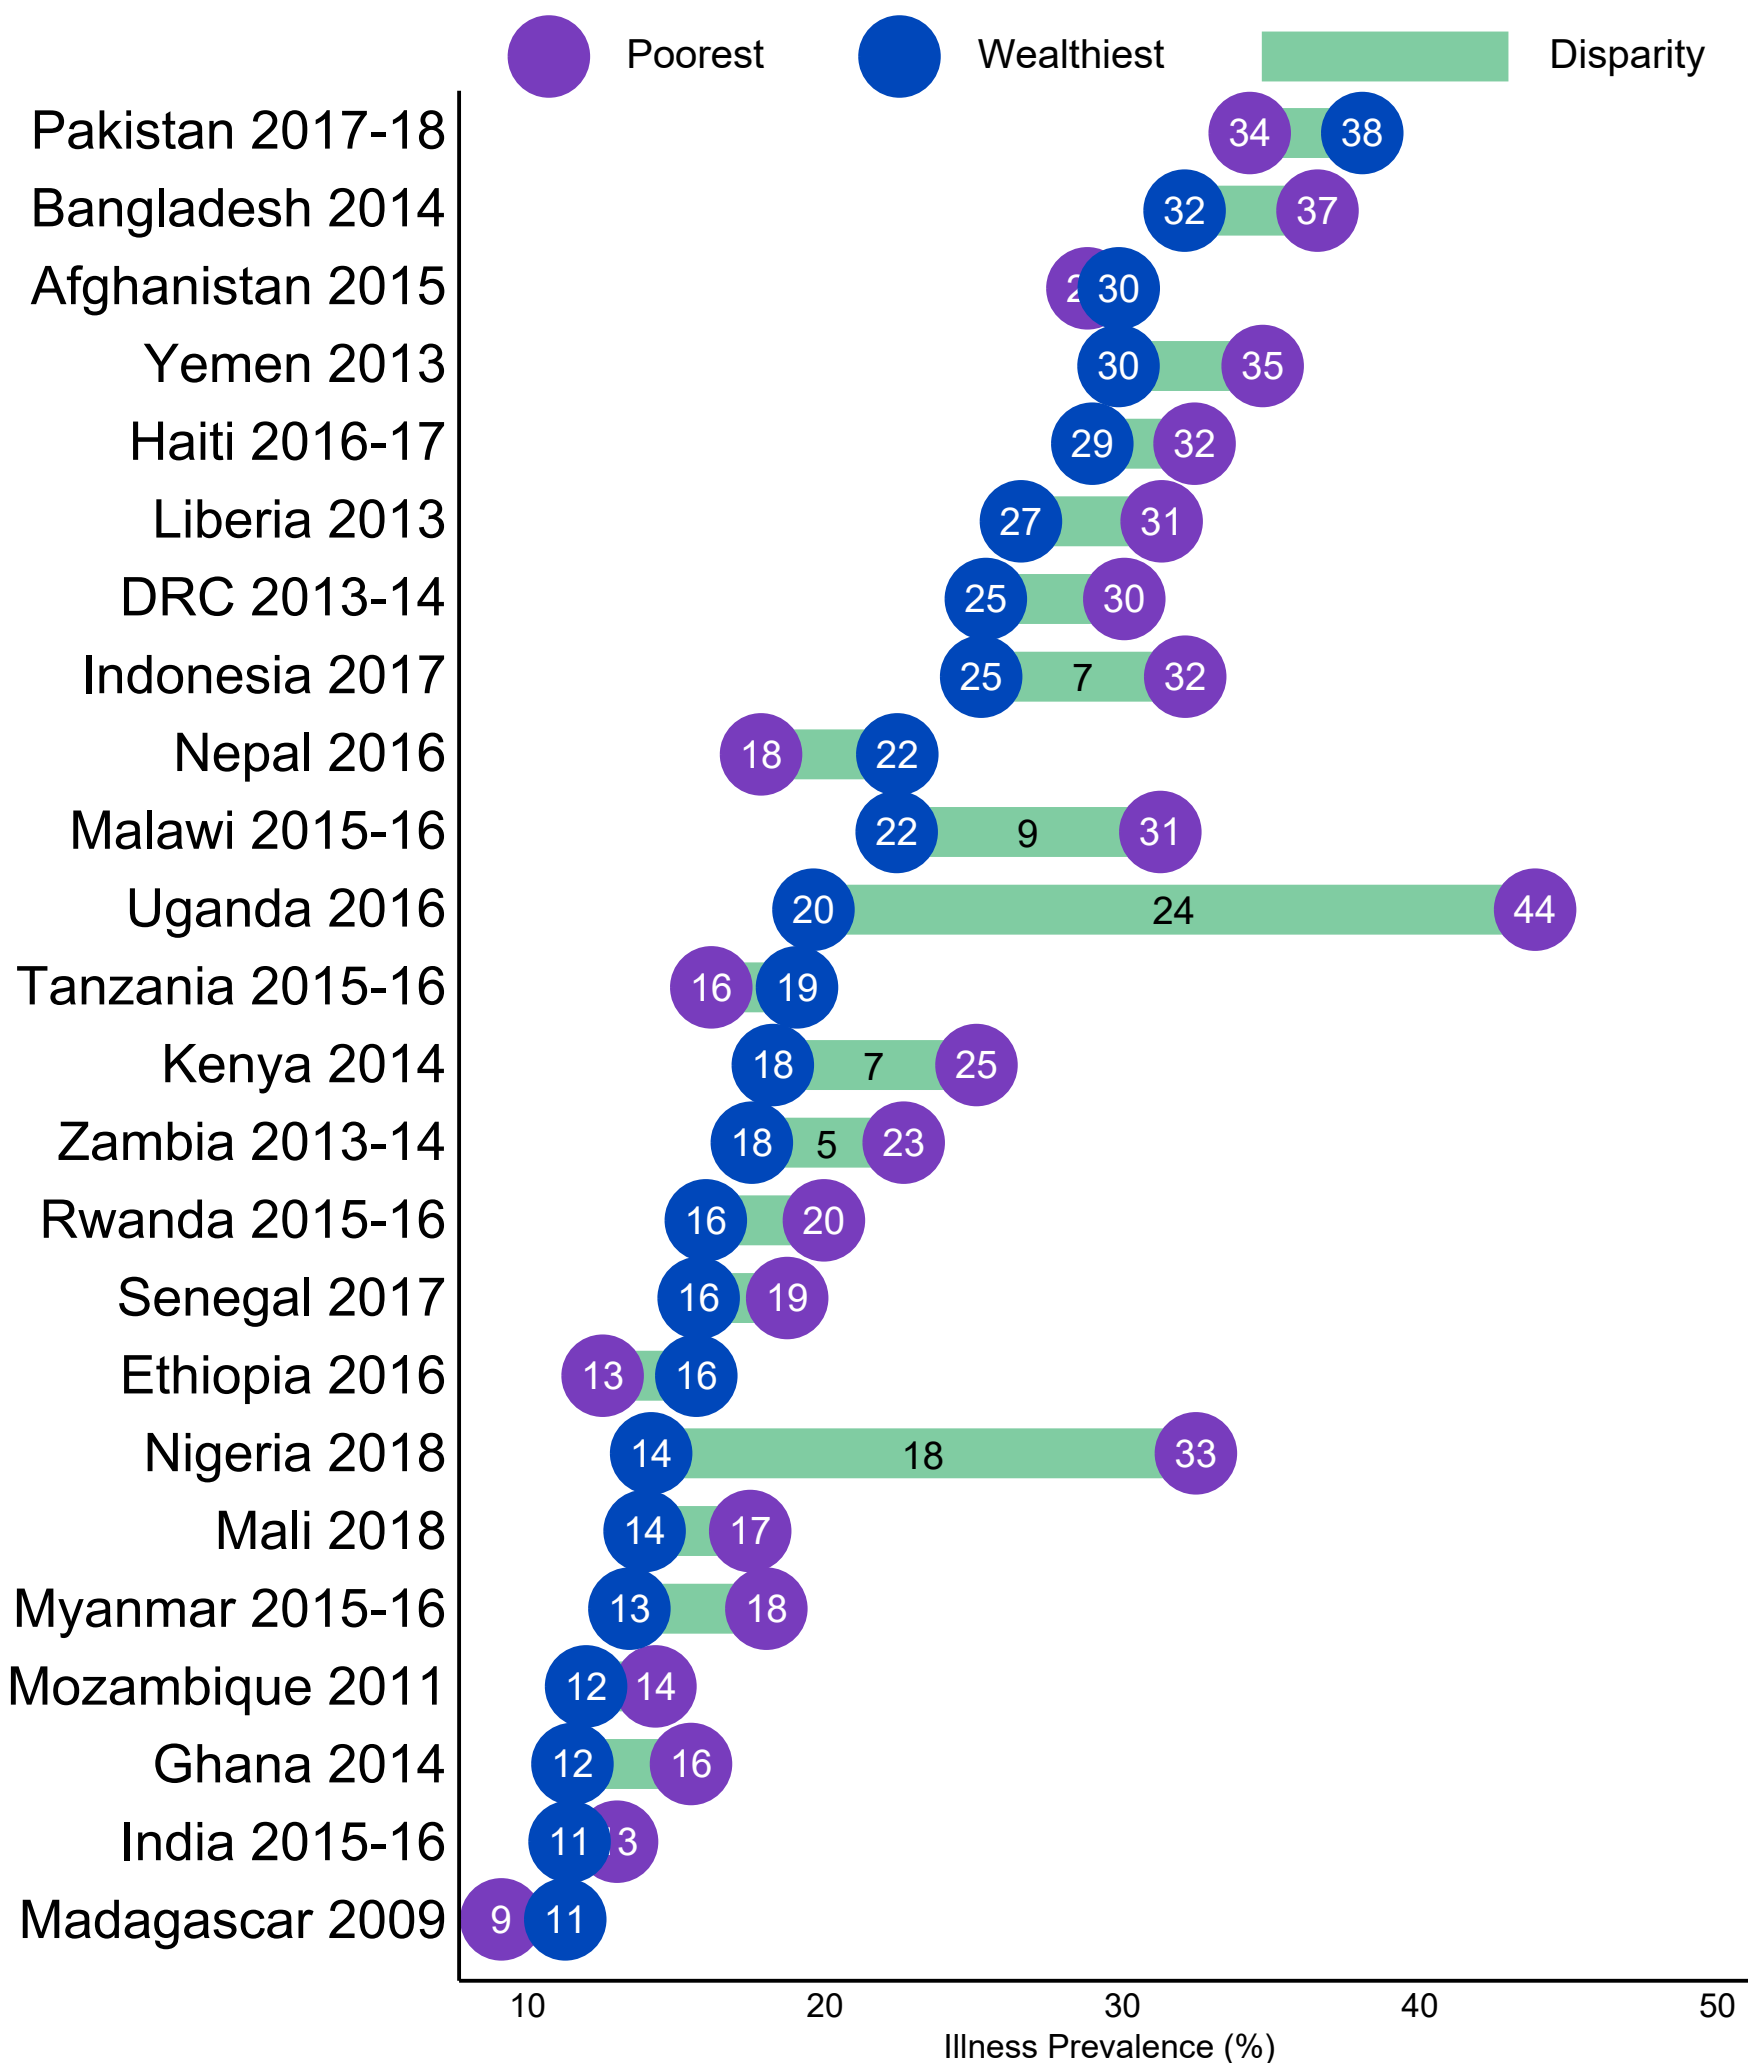

Supplement: 20-00115-Bradley-Supplemental-Figures.pdf [file 20-00115-Bradley-Supplemental-Figures.pdf]
